# Supplementary material
Source: PubMed Central journal article supplement (PMC2689954)
Supplement: pp.109.138099_1.pdf [file pp.109.138099_1.pdf]

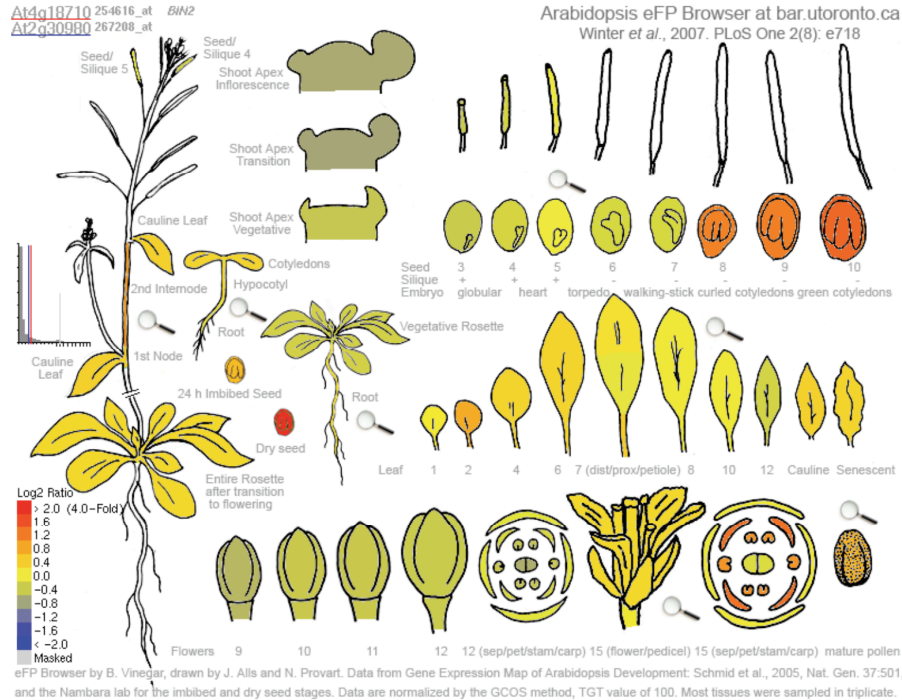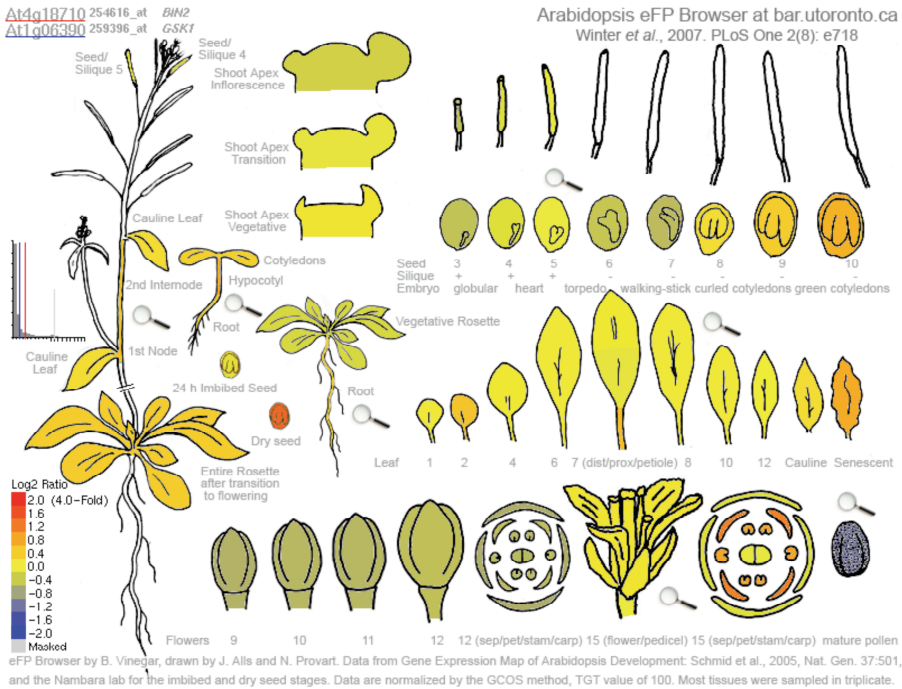

**Supplemental Figure S1.** *BIN2* and its two homologs exhibit similar expression profiles. A, Comparison between *BIN2* and *BIL1*. B, Comparison between *BIN2* and *BIL2*. The two figures were generated using the Arabidopsis e-FP browser at <http://bbc.botany.utoronto.ca/efp/cgi-bin/efpWeb.cgi> [Winter et al., 2007. PLoS One 2(8): e718]. The color scale at the right bottom corner indicates the relative expression levels of *BIN2*, *BIL1*, and *BIL2*: red means higher *BIN2* expression level, blue shows higher *BIL* expression, while yellow indicates similar expression levels between *BIN2* and *BIL1/BIL2*.

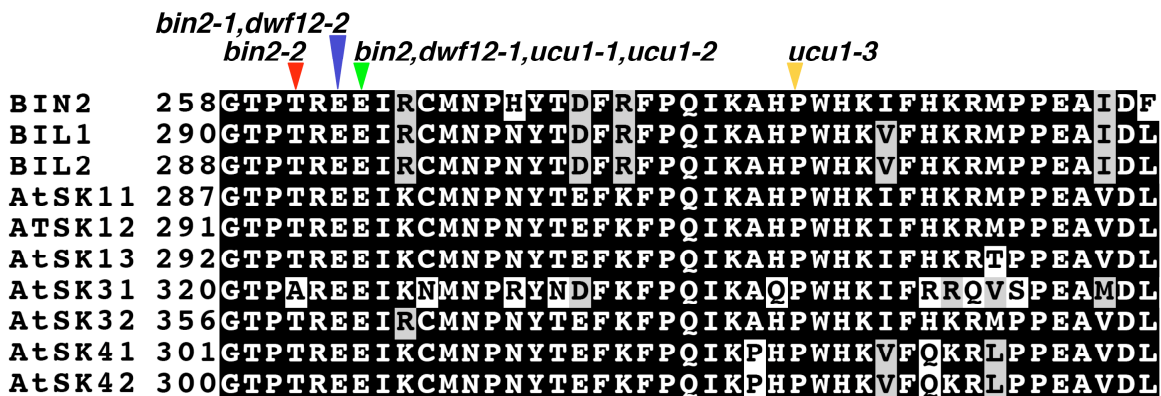

**Supplemental Figure S2.** Conservation of amino acids critical for BR-mediated inhibition of GSK3-like kinase activity. Sequence data for this analysis can be found in the GenBank database under the following accession numbers: BIN2, At4g18710, NP\_193606; BIL1, At2g30980, NP\_180655; BIL2, At1g06390, NP\_973771, AtSK11, At5g26751, NP\_568486; AtSK12, At3g05840, NP\_187235; AtSK13, At5g14640, NP\_196968; AtSK31, At3g61160, NP\_191675; AtSK32, At4g00720, NP\_191981; AtSK41, At1g09840, NP\_001031013; AtSK42, At1g57870, NP\_176096. The sequences were aligned using the Mcoffee program at <http://tcoffee.vital-it.ch/cgi-bin/Tcoffee/tcoffee.cgi/index.cgi> and shaded by the BoxShade Server at [http://www.ch.embnet.org/software/BOX\\_form.html](http://www.ch.embnet.org/software/BOX_form.html). Amino acids that are identical or similar in 60% of the analyzed sequences are shaded by black or grey background whereas amino acids that are not similar with the majority sequences are indicated by black letters with white background. Color arrows indicate amino acids mutated in 8 known gain-of-function *bin2/ucu1/dwf12* mutants.

**Supplementary Table S1.** Primers Used for Genotyping, Sequencing, and RT-PCR Analyses.

| Name                        | Sequence (from 5' to 3')                                                 | Comment                                                                                                                  |
|-----------------------------|--------------------------------------------------------------------------|--------------------------------------------------------------------------------------------------------------------------|
| <i>gBIN2</i> For/Rev        | For: CGTGTCTGCGTAATTAACCAGCAATTTCAA<br>Rev: GCAAAGAGGAGACTGTGTTTTTCACCAA | to amplify and sequence the entire <i>BIN2</i> gene from putative <i>ucu1-3</i> suppressors                              |
| <i>BIN2</i> SG1             | GGTTTTGTGCTGATATTTAA                                                     | sequence <i>BIN2</i>                                                                                                     |
| <i>BIN2</i> SG2             | ACCGCTACAAGTCGAATGA                                                      | sequence <i>BIN2</i>                                                                                                     |
| <i>BIN2</i> SG3             | CTGTGATCTTGTCATTTAC                                                      | sequence <i>BIN2</i> and genotype <i>bin2-1</i> and <i>bin2-3</i>                                                        |
| <i>BIN2</i> SG4             | TGAAGAAACCTCAAGACC                                                       | sequence <i>BIN2</i> and genotype <i>bin2-1</i> and <i>bin2-3</i> . (Xho I can't cut SG3/SG4 fragment in <i>bin2-1</i> ) |
| <i>ucu1-3</i> dCAPS         | For: CAGGTTTCCACAGATAAAGGCAGAT<br>Rev: ATCTGCCTTTATCTGTGAAACCTGAAATC     | Hinf I cuts the mutant PCR product                                                                                       |
| LB4                         | CGTGTGCCAGGTGCCACGGAATAGT                                                | with <i>BIN2</i> SG3 to amplifying T-DNA from <i>bin2-3</i> T-DNA insertional mutant                                     |
| <i>BIL1</i> EK              | For: GTECTCCAACCTCGCAAAGAAATCCGGTG<br>Rev: CACCGGATTTCTTTGCGAGTTGGAGTAC  | Used for site-directed mutagenesis to change E295(GAA) to K(AAA) in <i>BIL1</i>                                          |
| <i>BIL1</i> Seq             | 3: AGGTAACCTTATACATGGTAG<br>4: CTTACATGATTGAATTCTCTG                     | Used for genotyping <i>bil1</i> T-DNA insertional mutation                                                               |
| JL270                       | TTTCTCCATATTGACCATCATACTCATTG                                            | with <i>BIL1</i> Seq4 to genotype <i>bil1</i> mutation<br>with <i>BIL2</i> Seq1 to genotype <i>bil2</i> mutation         |
| <i>BIL1</i> RT              | For: TCCACAAGCGGATGCCTCCG<br>Rev: CAGCTTGAAATGGAAAGCCA                   | RT-PCR analysis of <i>BIL1</i> expression                                                                                |
| <i>BIL2</i> EK              | For: GTECTCCAACCTCGTAAAGAAATTCGATG<br>Rev: CATCGAATTTCTTTIACGAGTTGGAGTAC | Site-directed mutagenesis to change E293(GAA) to K(AAA) in <i>BIL2</i>                                                   |
| <i>BIL2</i> Seq             | 1: TCGTGCTCCAGAACTGATC<br>2: GCAAGGTCTATTGCTTCTG                         | To genotype the <i>bil2</i> T-DNA insertional mutation                                                                   |
| <i>BIL2</i> RT              | For: TTCATAAACGGATGCCTCCA<br>Rev: ACTGTTTTGTAATCCTGTGC                   | RT-PCR analysis of <i>BIL2</i> gene expression in the <i>bil2</i> mutant                                                 |
| <i>SAUR-AC1</i> RT          | For: GAGGAGTTTCTTGGGTGCTAAG<br>Rev: CATTGTATCTGAGATGTGACTG               | RT-PCR analysis of the <i>SAUR-AC1</i> gene expression                                                                   |
| <i>DWF4</i> RT              | For: CACGAGCAACGATATTGAAGTTC<br>Rev: CCTAAGCTCTTCAACGGCTTTAG             | RT-PCR analysis of the <i>DWF4</i> gene expression                                                                       |
| $\beta$ - <i>Tubulin</i> RT | For: ATCCAGGTTTGTCACTCGTTG<br>Rev: TATGAAGAAGTGAAGACGGG                  | used to analyze $\beta$ - <i>Tubulin</i> expression as a control for RT-PCR experiments                                  |
| <i>bri1-5</i> dCAPS         | For: GTGTAATTTTCGATGGCGTTACCT<br>Rev: GGTTAAAGAAGCAGAGCA                 | genotype <i>bri1-5</i> mutation, Pst I cuts the DNA fragment with <i>bri1-5</i> mutation                                 |
